# Supplementary material for: Adherence to DASH-Style Dietary Pattern Impacts on Adiponectin and Clustered Metabolic Risk in Older Women
Source: MDPI journal article supplement (doi:10.3390/nu11040805), 2019-04-09
Supplement: s1 [file s1]

**Table S1.** Daily intake of DASH-related food groups in the study sample. DASH: Dietary Approach to Stop Hypertension.

| Food groups                 | Median (interquartile range) |
|-----------------------------|------------------------------|
| Fruits (g)                  | 249 (151–352)                |
| Vegetables (g)              | 135 (98–196)                 |
| Nuts and legumes (g)        | 6.5 (0–25)                   |
| Whole grains (g)            | 31 (20–48)                   |
| Low fat dairy (g)           | 0 (0–150)                    |
| Red and processed meats (g) | 83 (56–107)                  |
| Sweetened beverages (g)     | 0 (0–42)                     |
| Sodium (mg)                 | 2250 (1860–2720)             |
